# Supplementary material for: The synthesis and properties of Iridium(iii)-cored dendrimers with carbazole peripherally functionalized β-diketonato dendrons
Source: Royal Society of Chemistry journal article supplement (doi:10.1039/b701822c), 2007-01-01

# Supporting Information

## The Synthesis and Properties of Iridium(III)-cored Dendrimers with Carbazole Peripherally Functionalized $\beta$ -Diketonato Dendrons

Bao-Lin Li,<sup>a, b</sup> Lei Wu,<sup>a, b</sup> Yan-Mei He,<sup>a</sup> Qing-Hua Fan<sup>a, \*</sup>

<sup>a</sup> Beijing National Laboratory for Molecular Sciences, Center for Chemical Biology, Institute of Chemistry, Chinese Academy of Sciences, Beijing 100080, P. R. China;

<sup>b</sup> Graduate School of the Chinese Academy of Sciences, Beijing 100080, China.

[fanqh@iccas.ac.cn](mailto:fanqh@iccas.ac.cn)

### Contents:

- A. Figure S1. Cyclic voltammograms of dendrimers (9-14).
- B. <sup>1</sup>H NMR and <sup>13</sup>C NMR spectra and mass spectra of the dendritic ligands and their iridium(III) complexes.

**A. Figure S1. Cyclic voltammograms of dendrimers (9-14):**

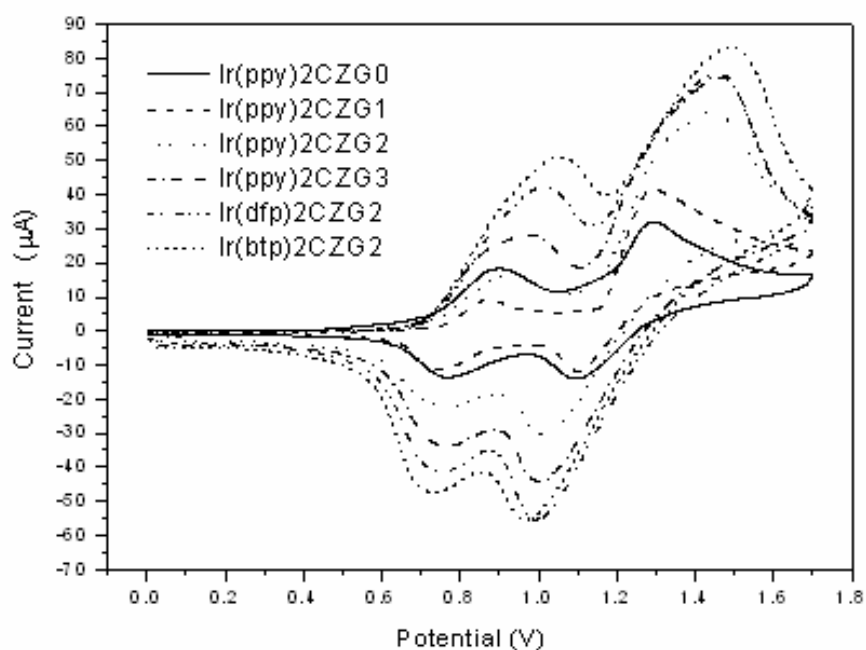

Electrochemistry was performed using a CHI 2.05. All measurements were made at room temperature with samples dissolved in dichloromethane, and the concentration of the iridium(III) complex was about  $1 \times 10^{-3}$  M. Tetra-*n*-butylammonium tetrafluoroborate was used as the supporting electrolyte, and its concentration was 0.1 M. Scan rate: 100 mV/s.

**B.  $^1\text{H}$  NMR and  $^{13}\text{C}$  NMR spectra and mass spectra of the dendritic ligands and their dendritic iridium(III) complexes:**

# CZG<sub>3</sub>OH

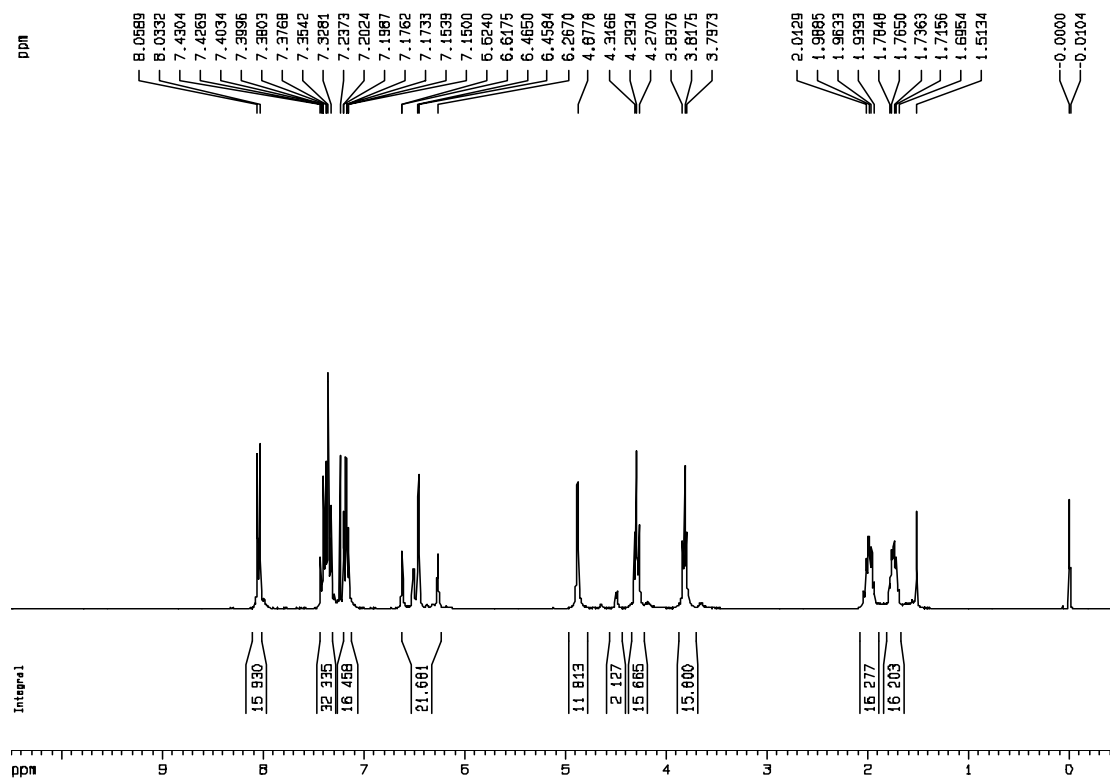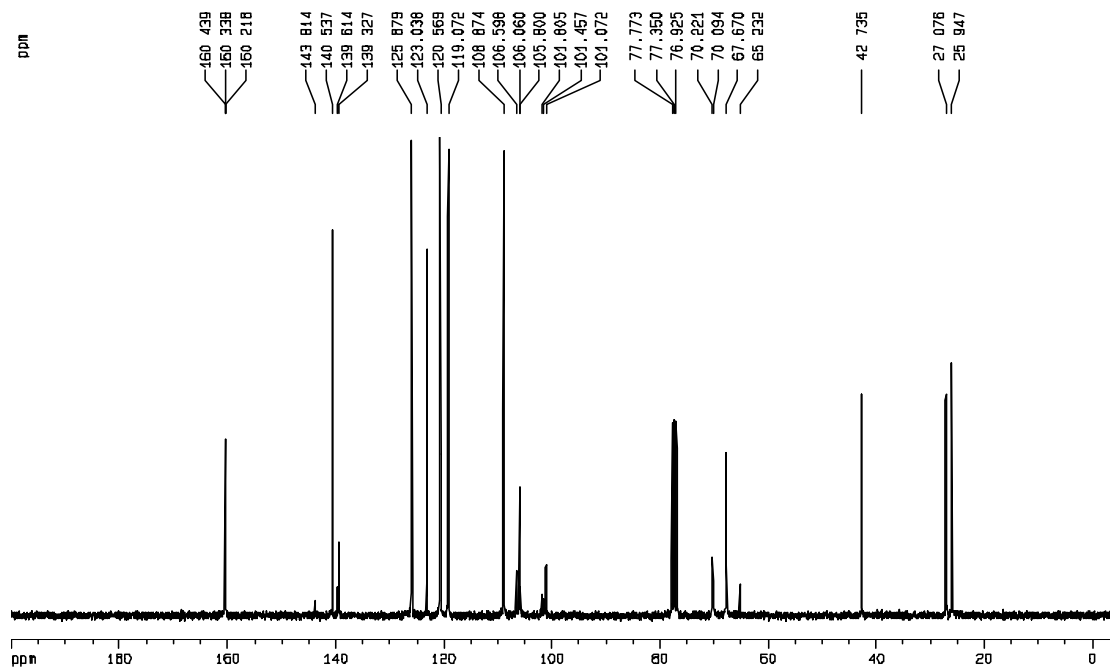

# CZG<sub>3</sub>Br (4)

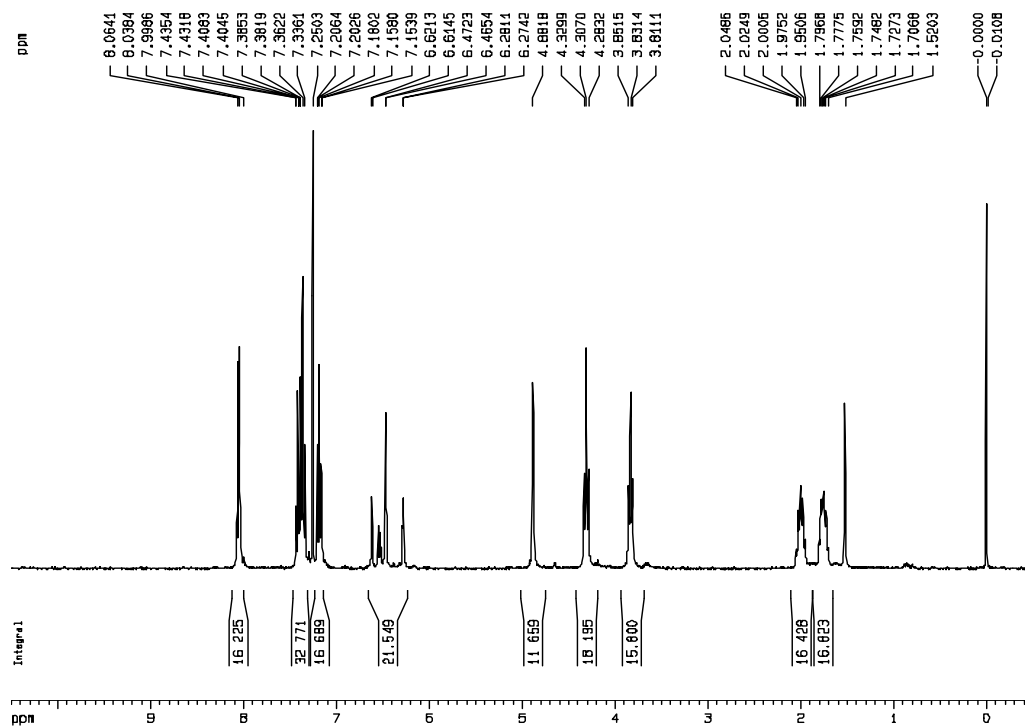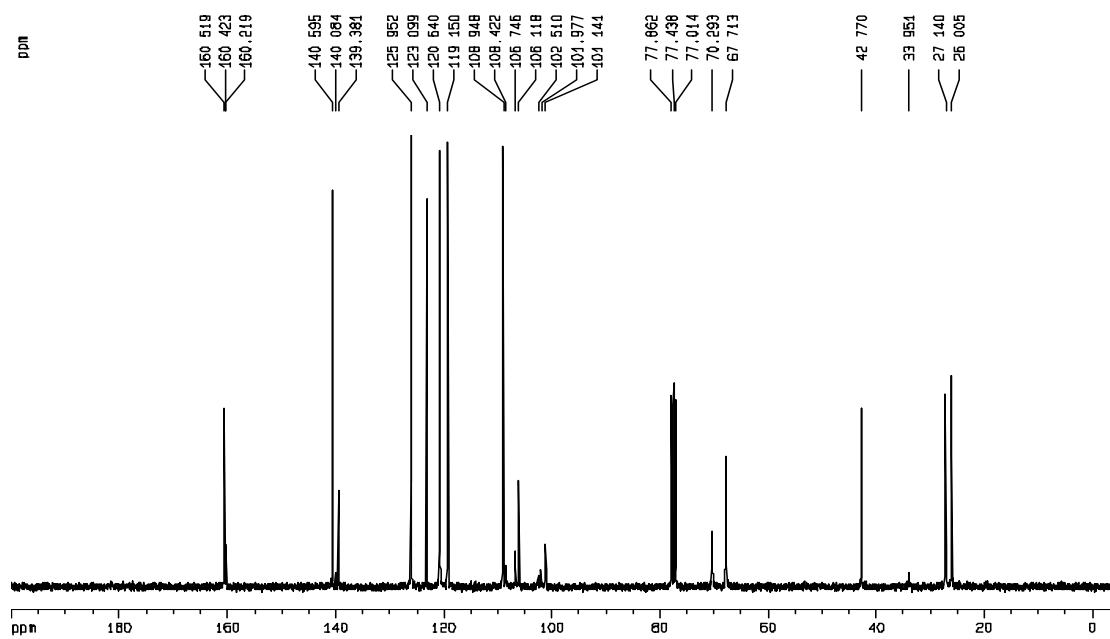

# CZG<sub>0</sub> (5)

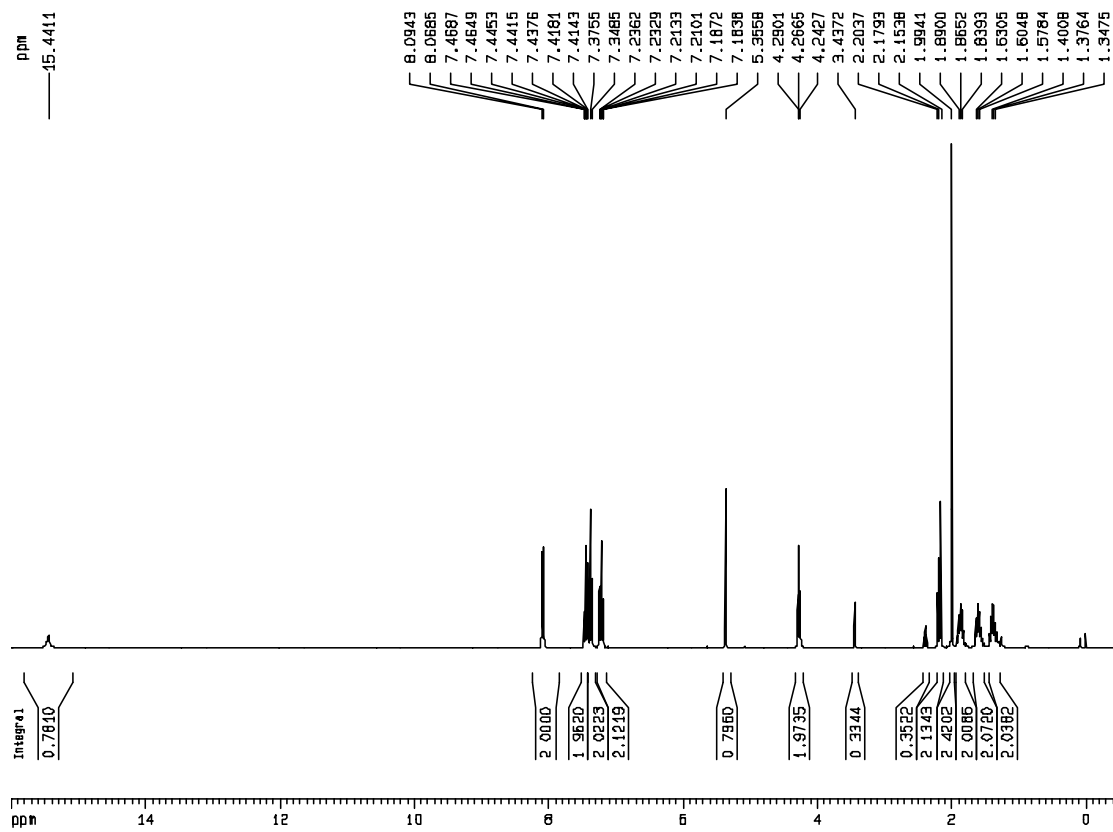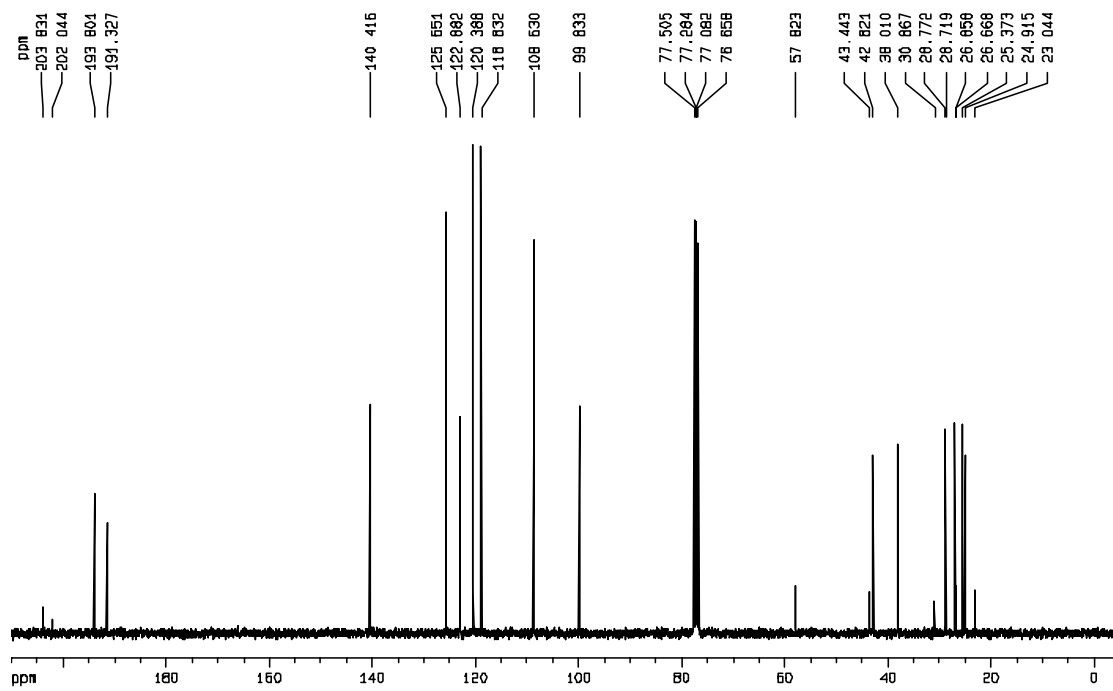

CZG0CHA\_061124113306 #73-95 RT: 0.27-0.35 AV: 23 NL: 1.53E6  
T: {0.0} - c ESI corona sid=70.00 det=1188.00 Full ms [ 100.00-400.00]

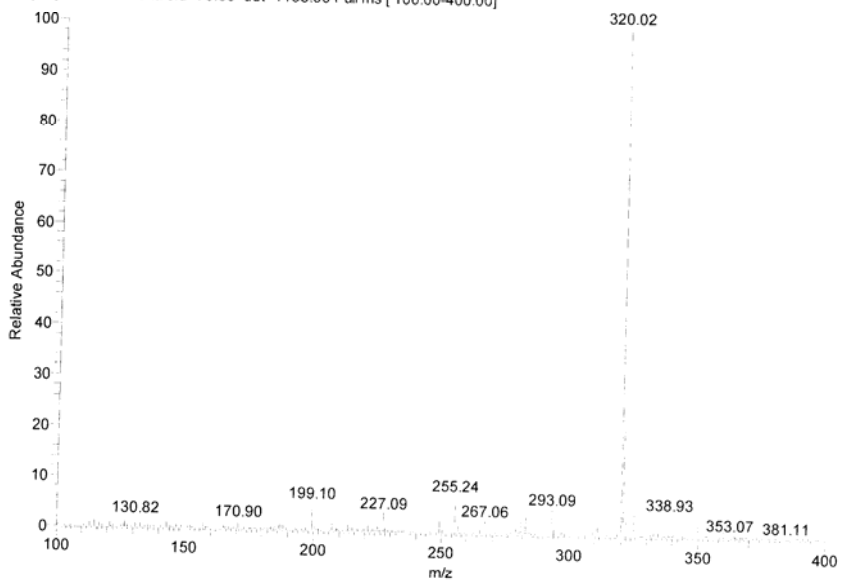

CZG<sub>1</sub> (6)

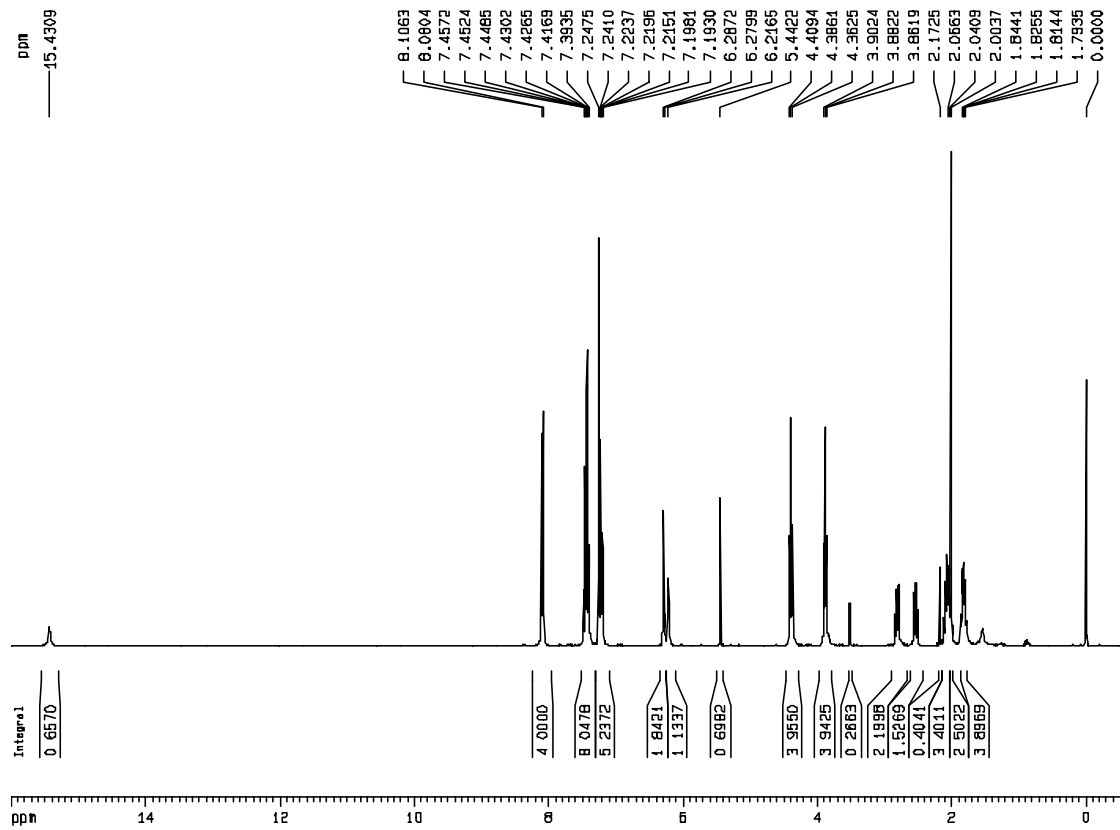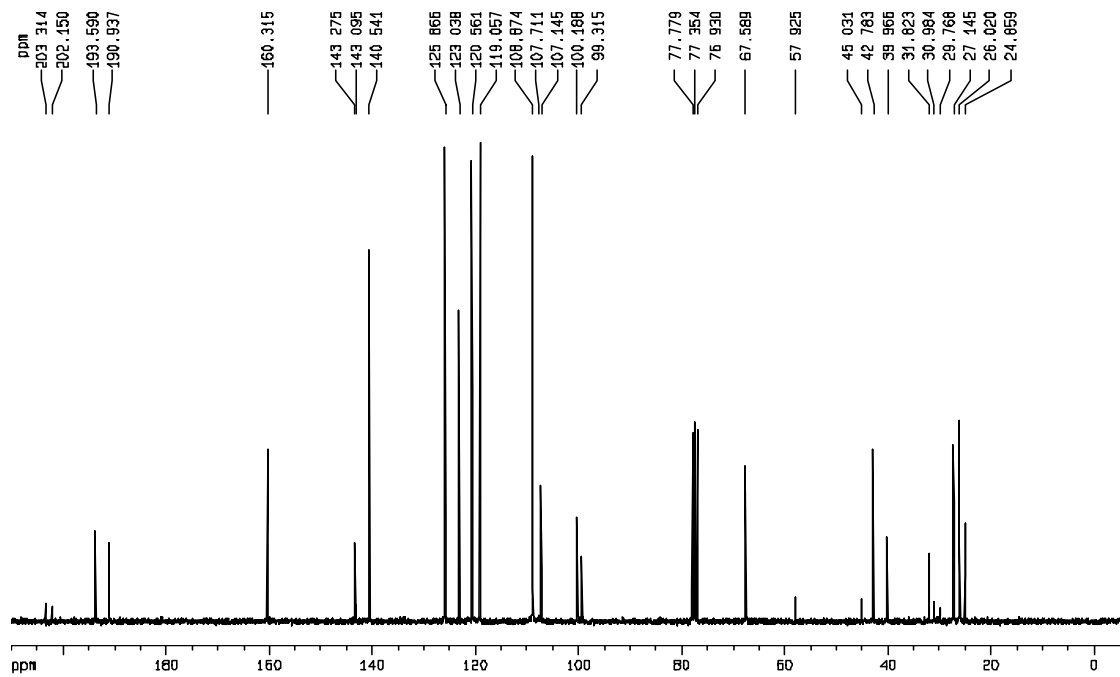

lbi-CZG1CHA\_061124130749 #51-61 RT: 0.19-0.22 AV: 11 NL: 1.74E5  
T: {0,0} + c ESI corona sid=70.00 det=1188.00 Full ms [600.00-800.00]

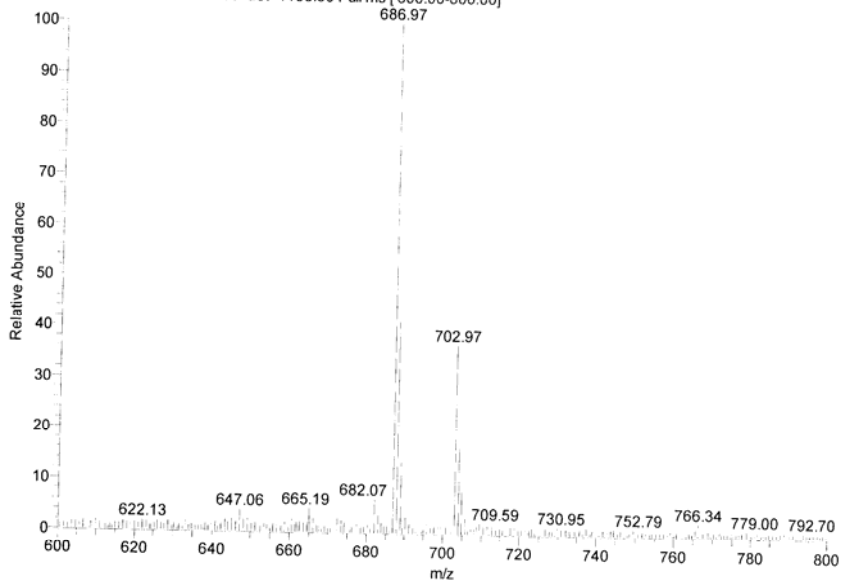



# CZG<sub>2</sub>(7)

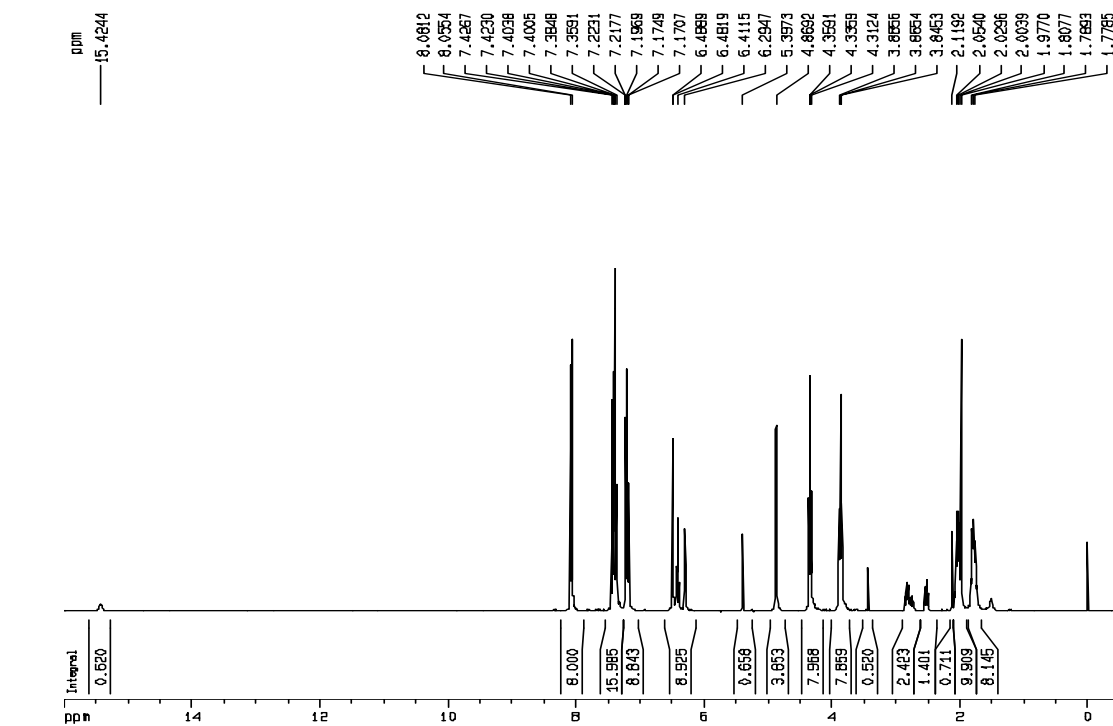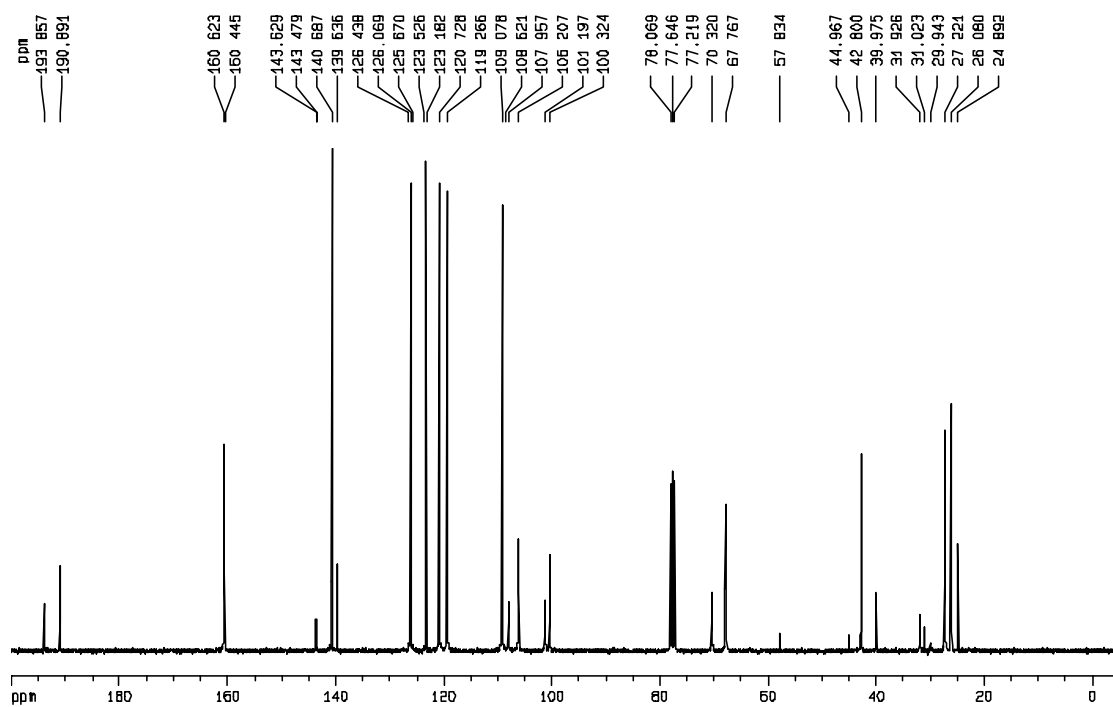

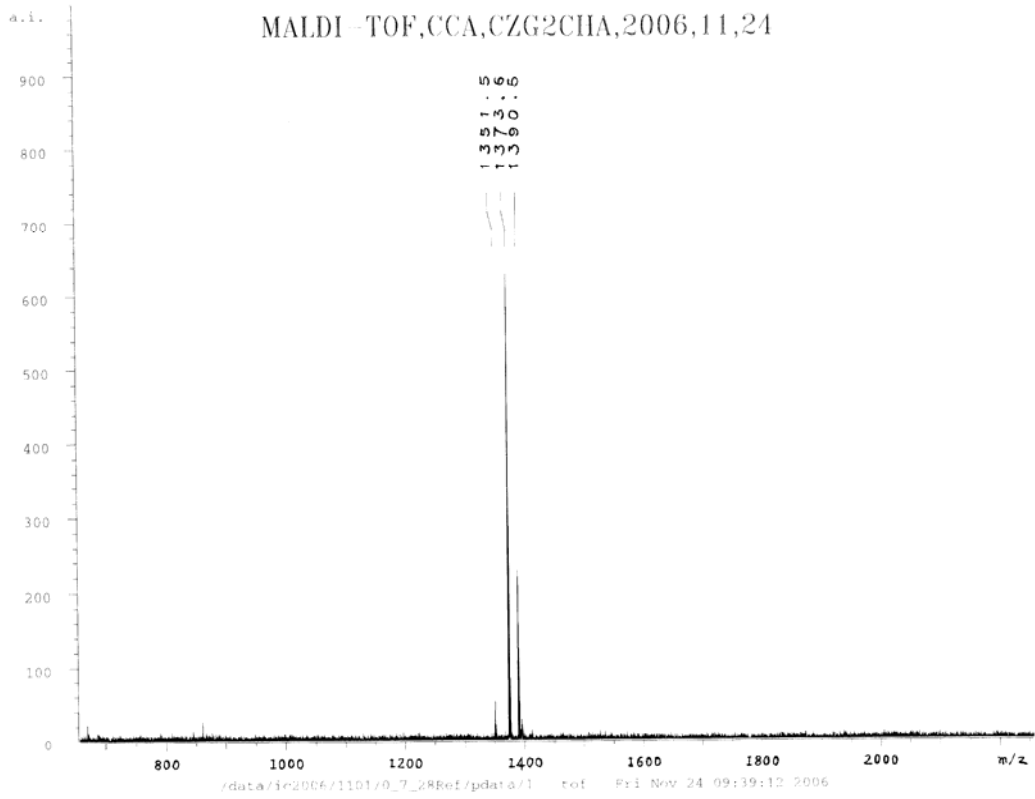

# CZG<sub>3</sub> (8)

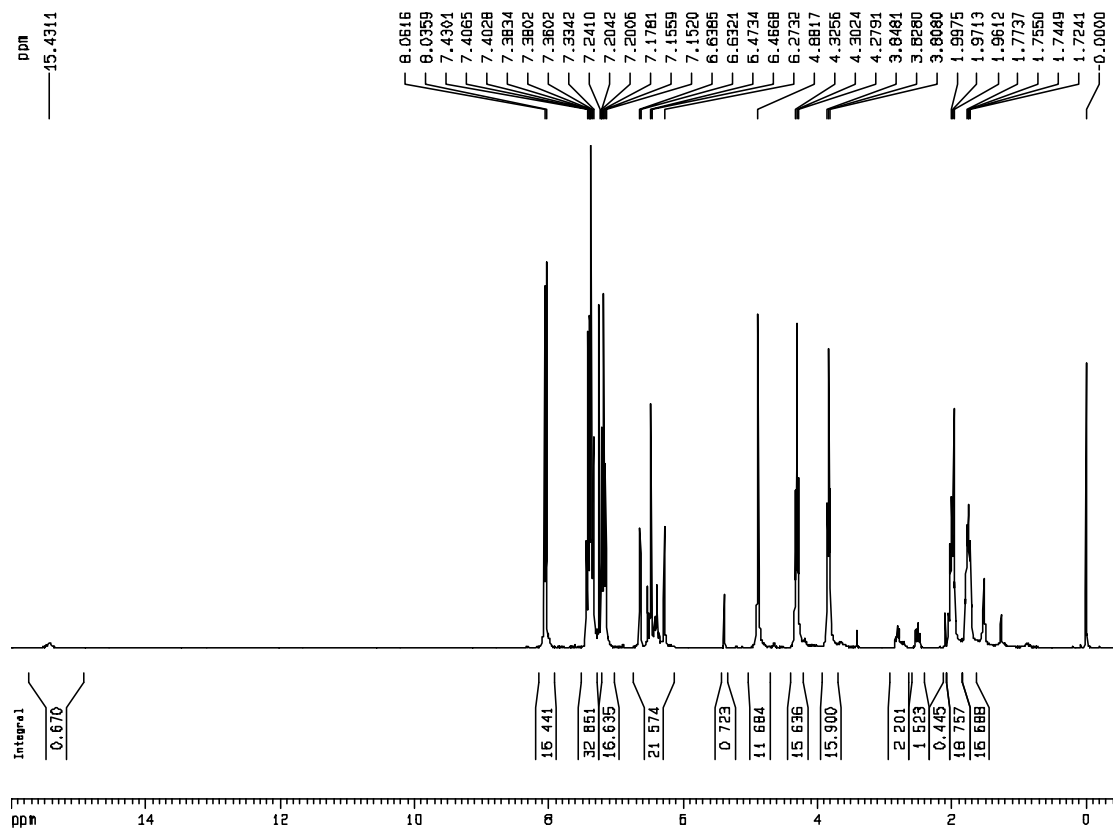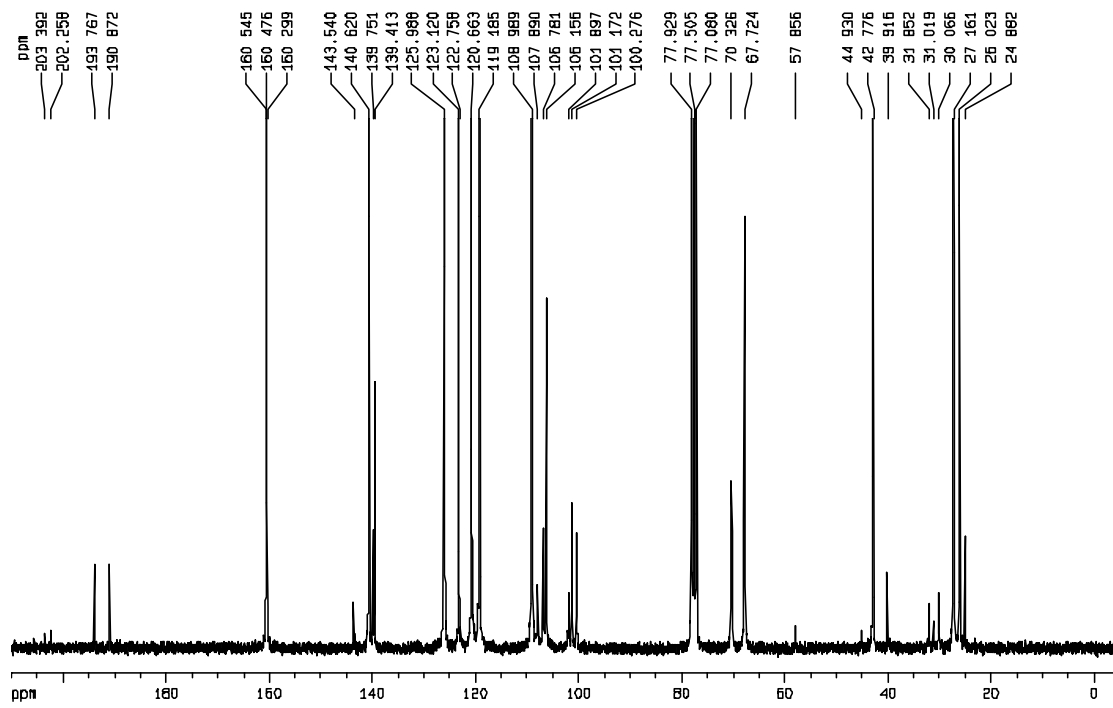

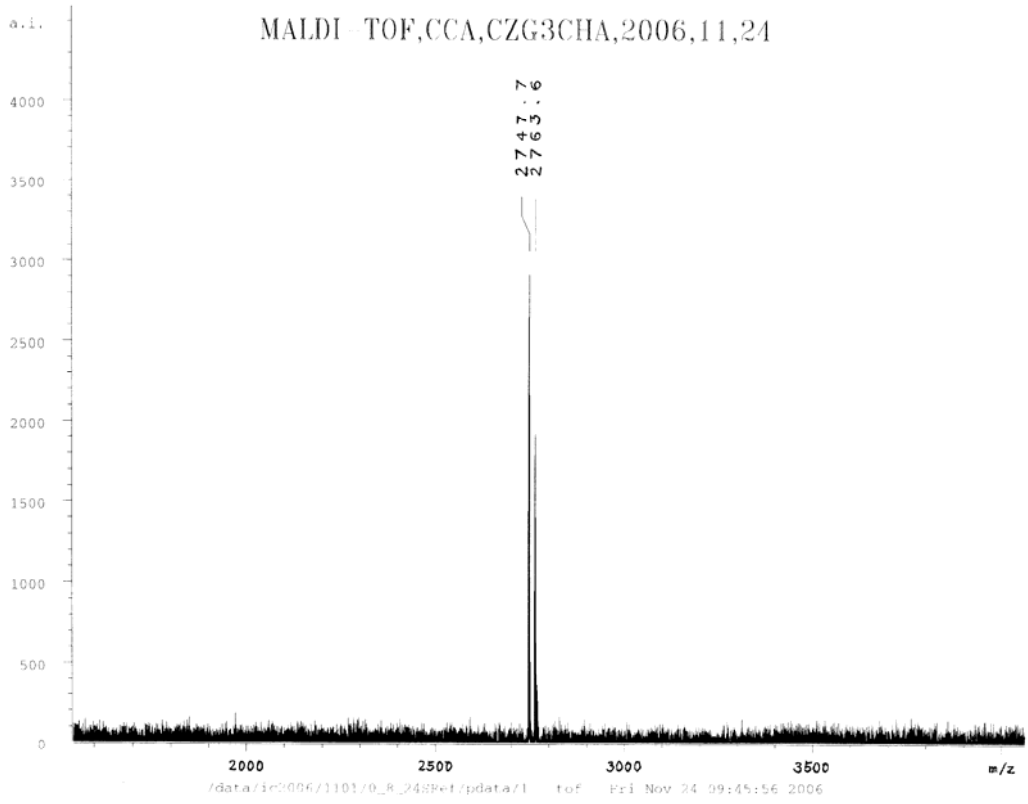

# Ir(ppy)<sub>2</sub>CZG<sub>0</sub> (9)

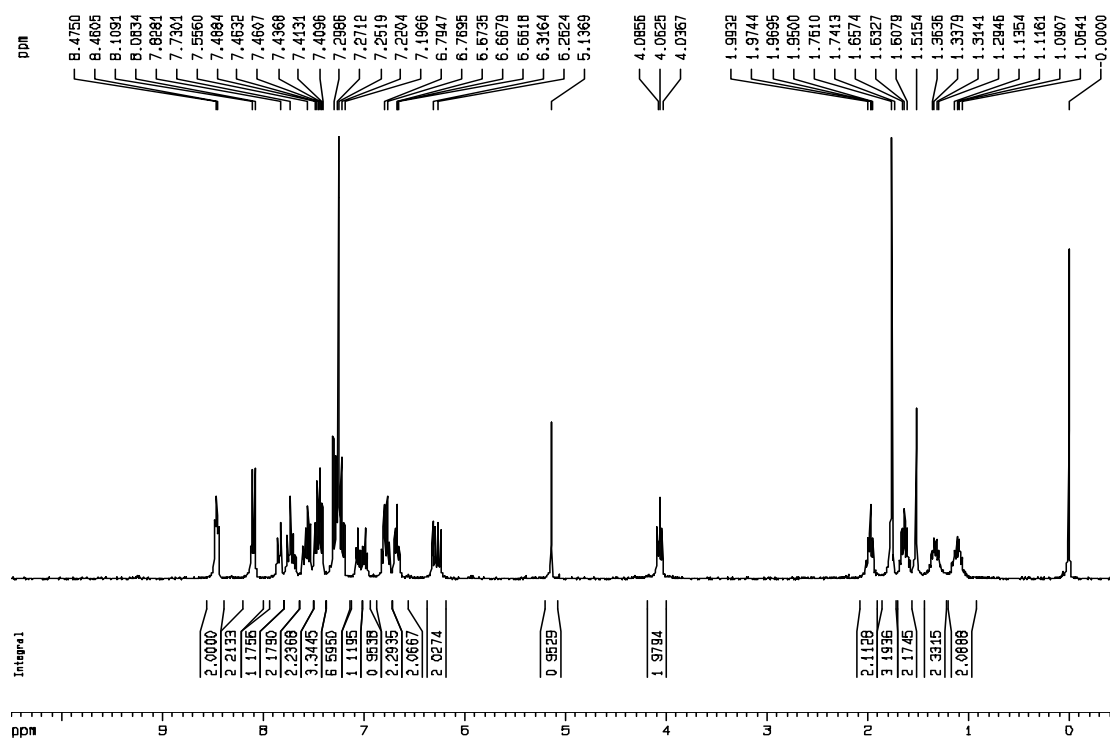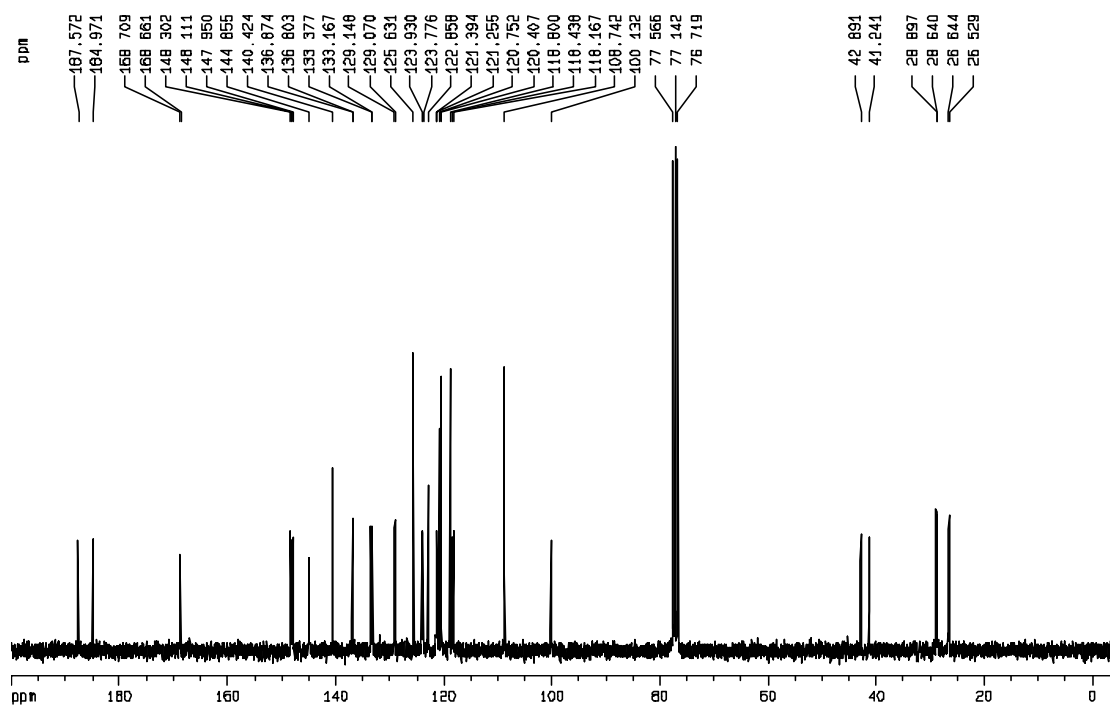

lbl-lr12 #51-149 RT: 0.19-0.56 AV: 99 NL: 6.14E4  
T: {0,0} + c ESI corona sid=70.00 det=1188.00 Full ms [700.00-1000.00]

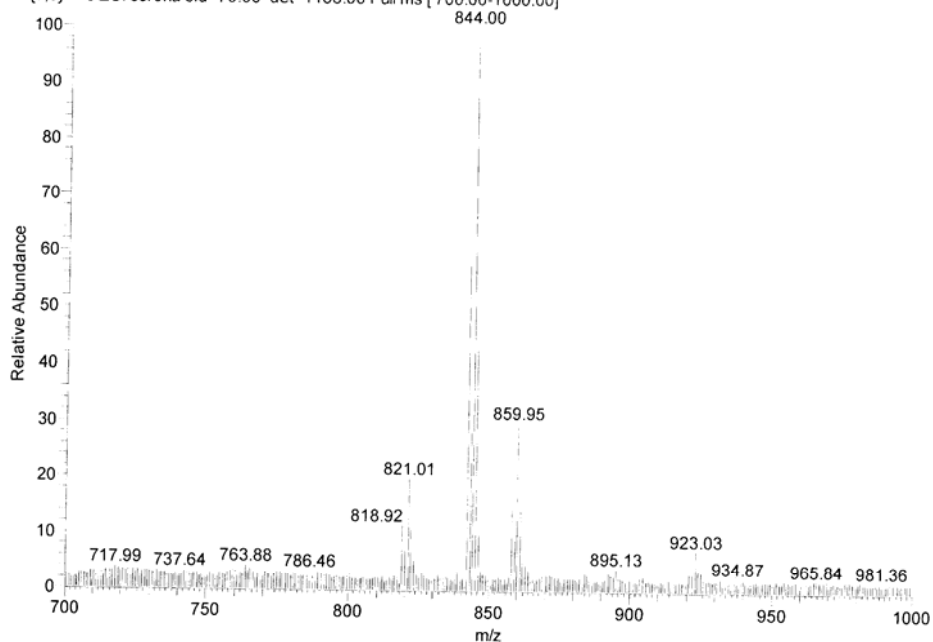

# Ir(ppy)<sub>2</sub>CZG<sub>1</sub> (10)

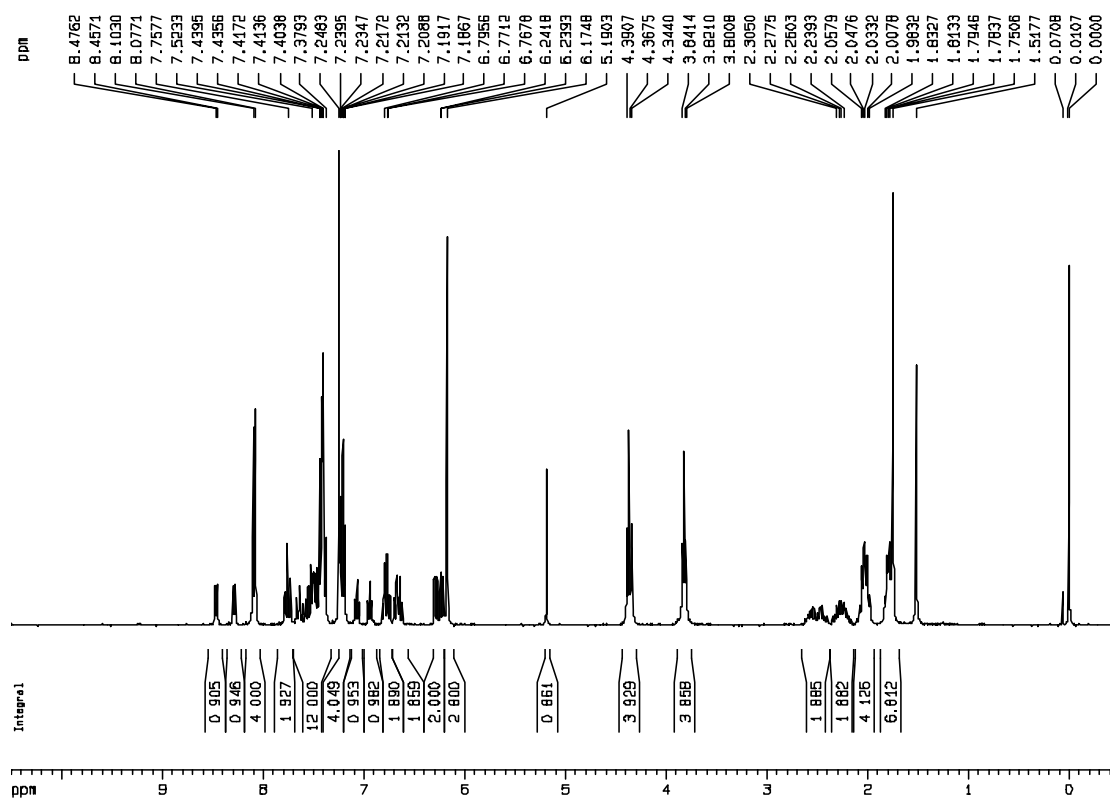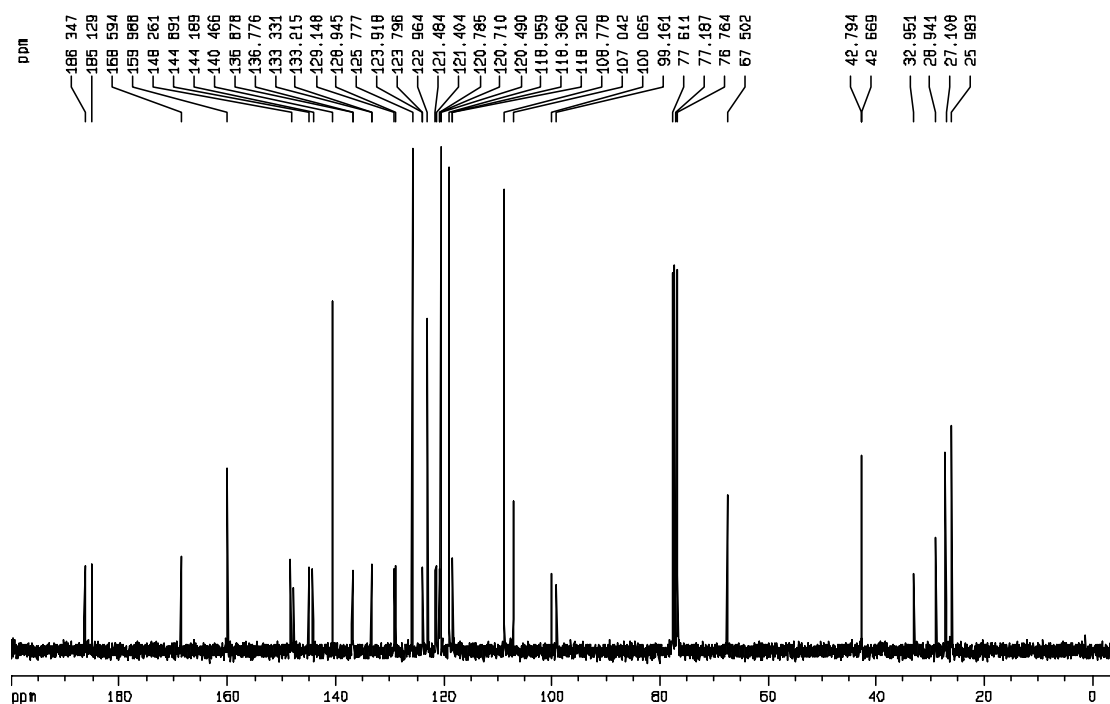

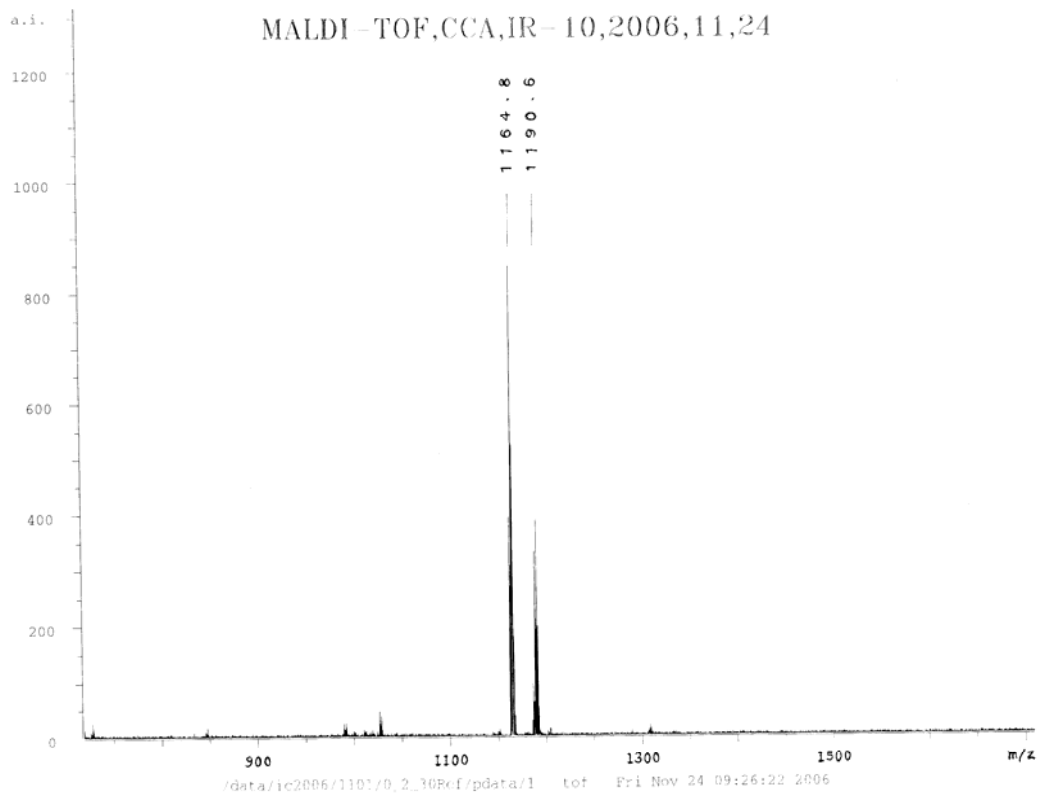



# Ir(ppy)<sub>2</sub>CZG<sub>2</sub> (11)

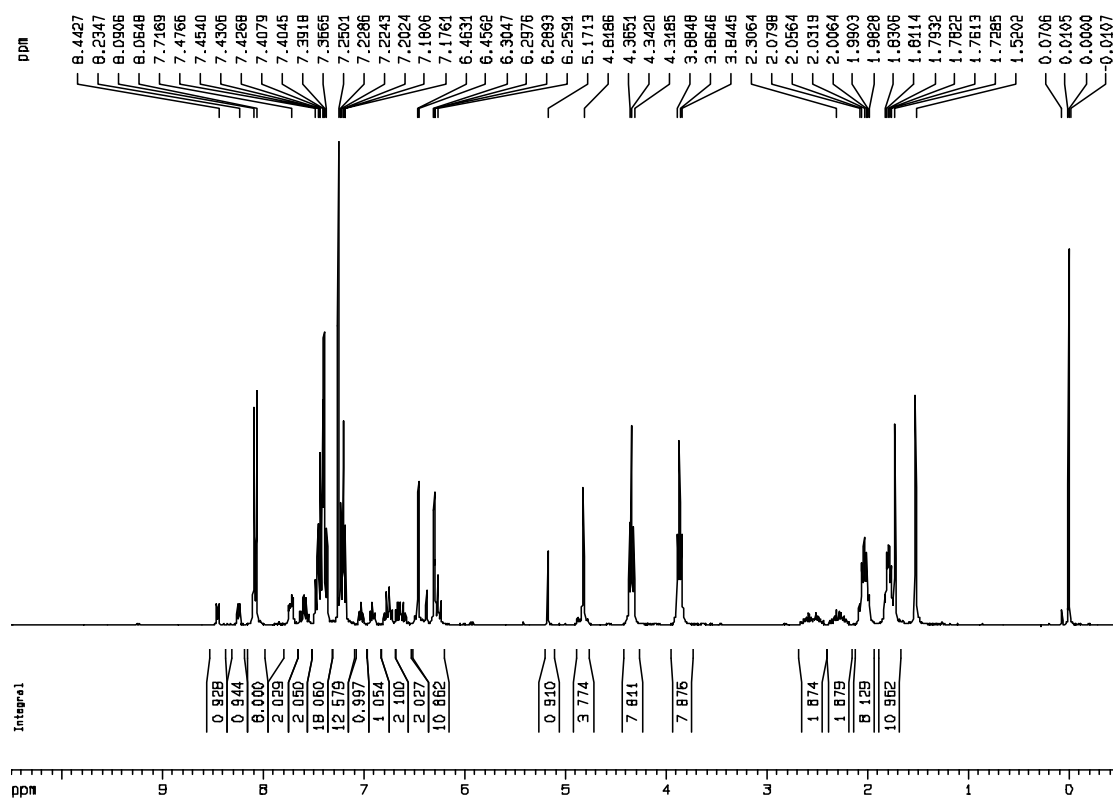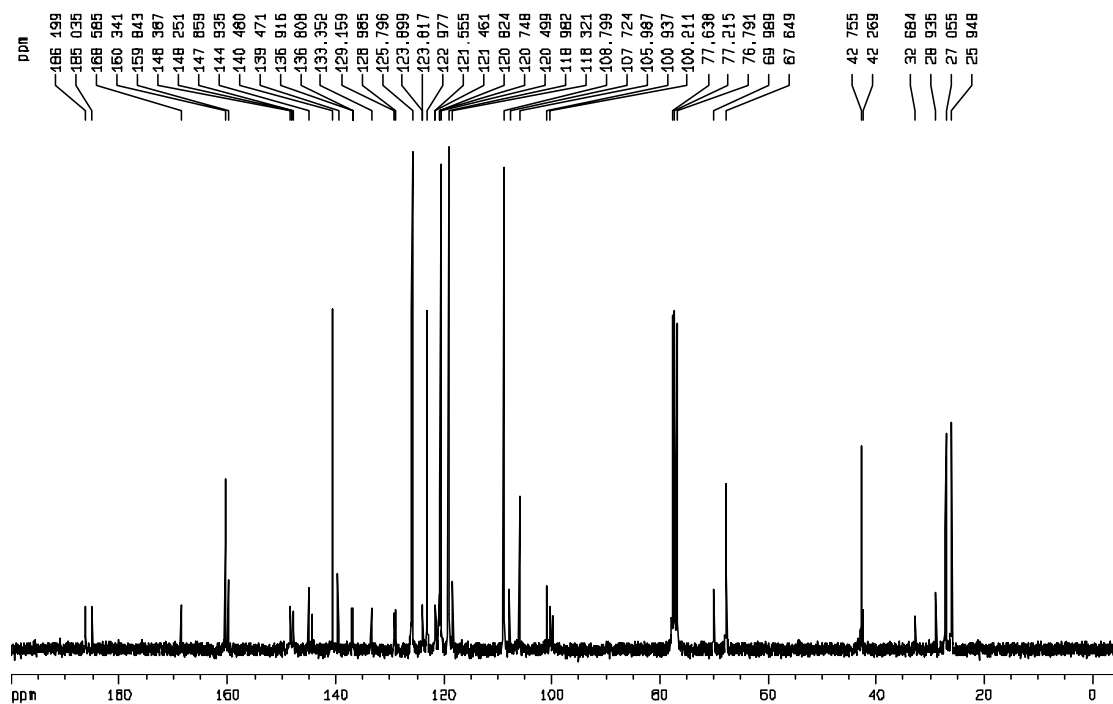

MALDI-TOF,CCA,IR -11,2006,11,24

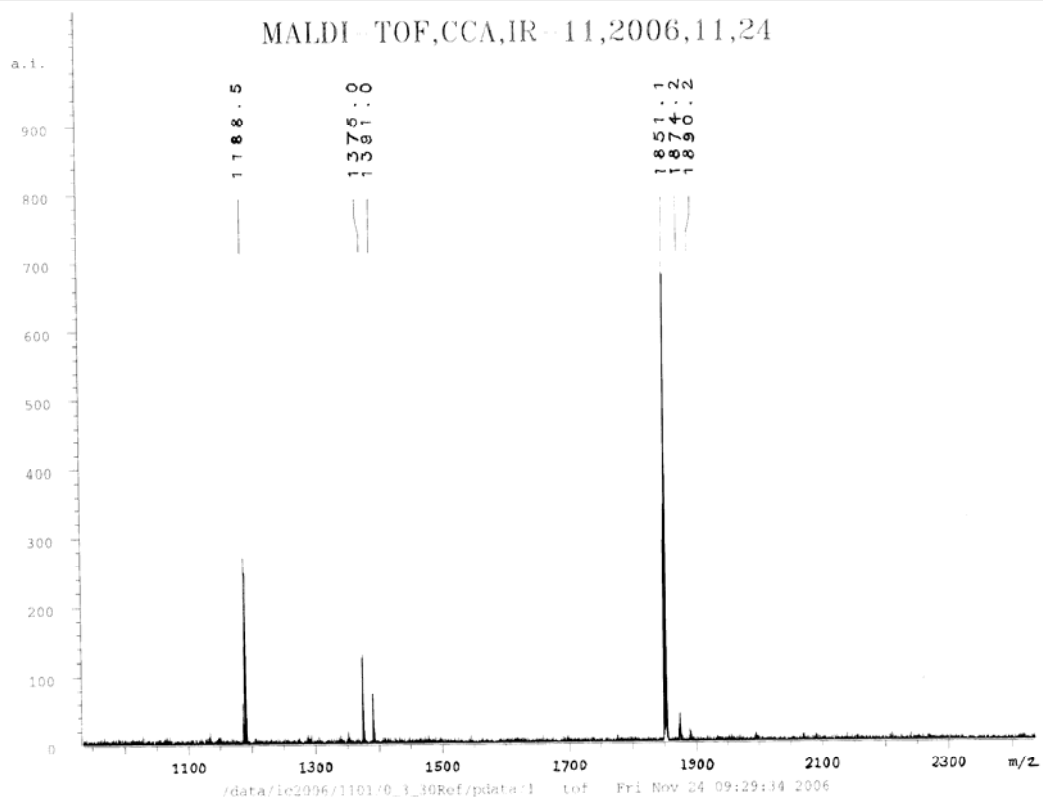

# Ir(ppy)<sub>2</sub>CZG<sub>3</sub> (12)

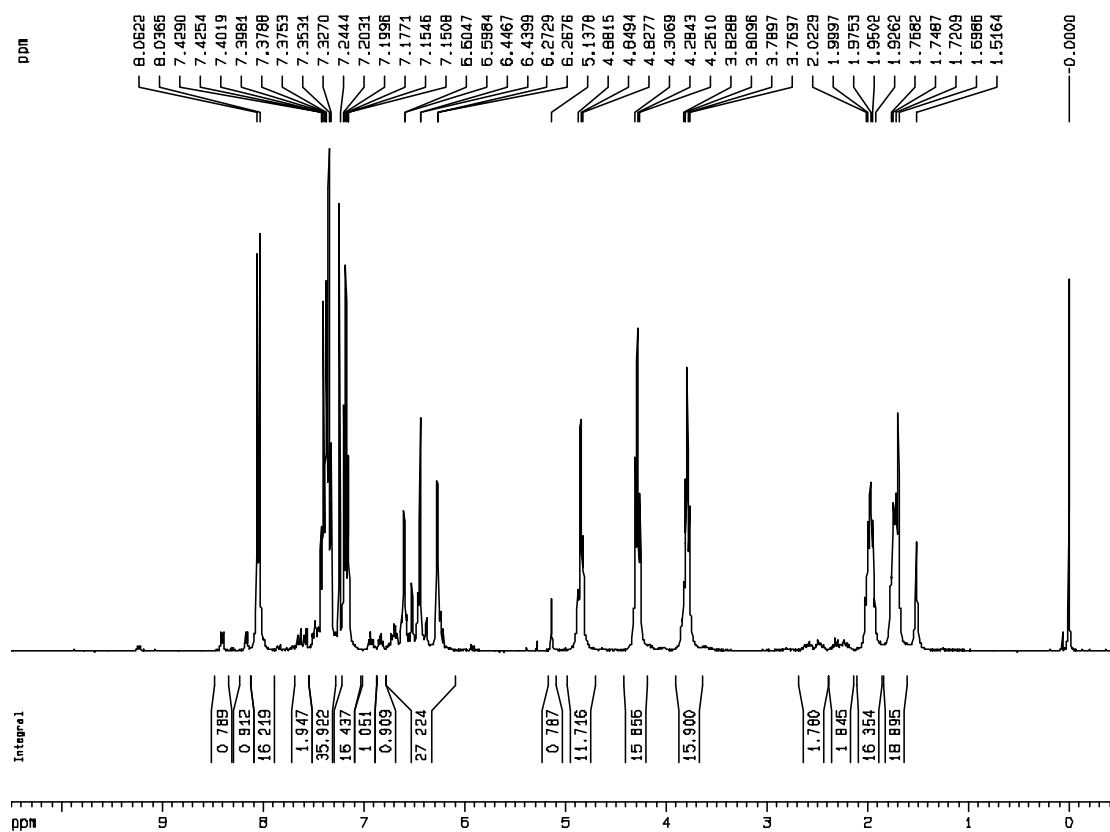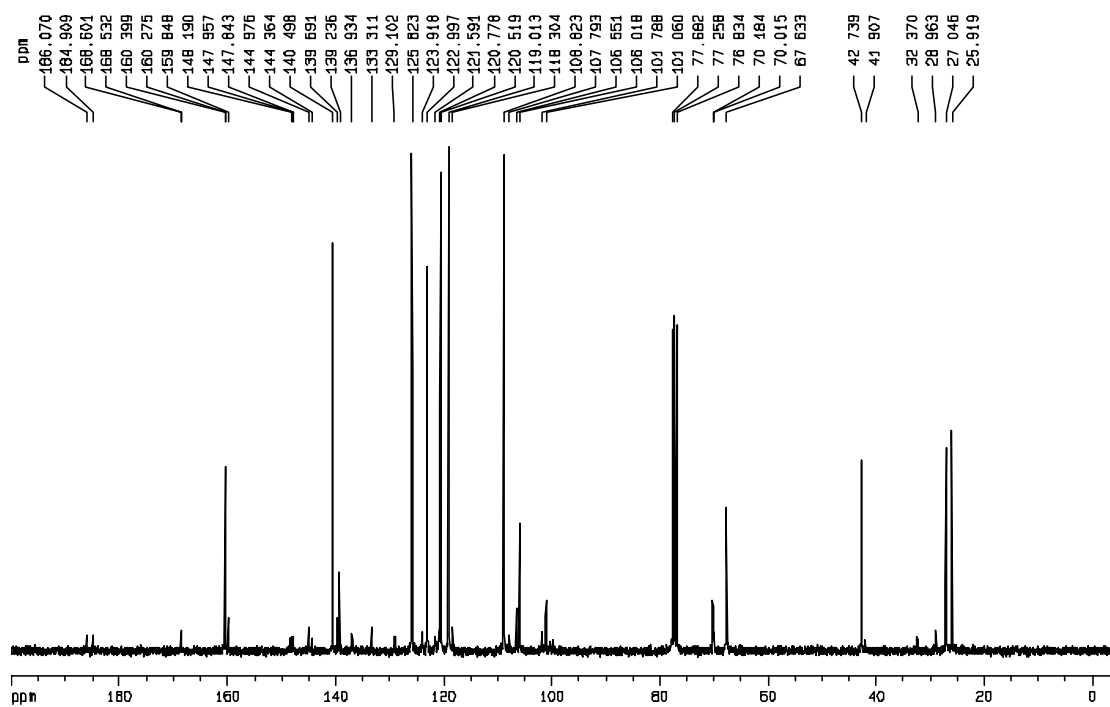

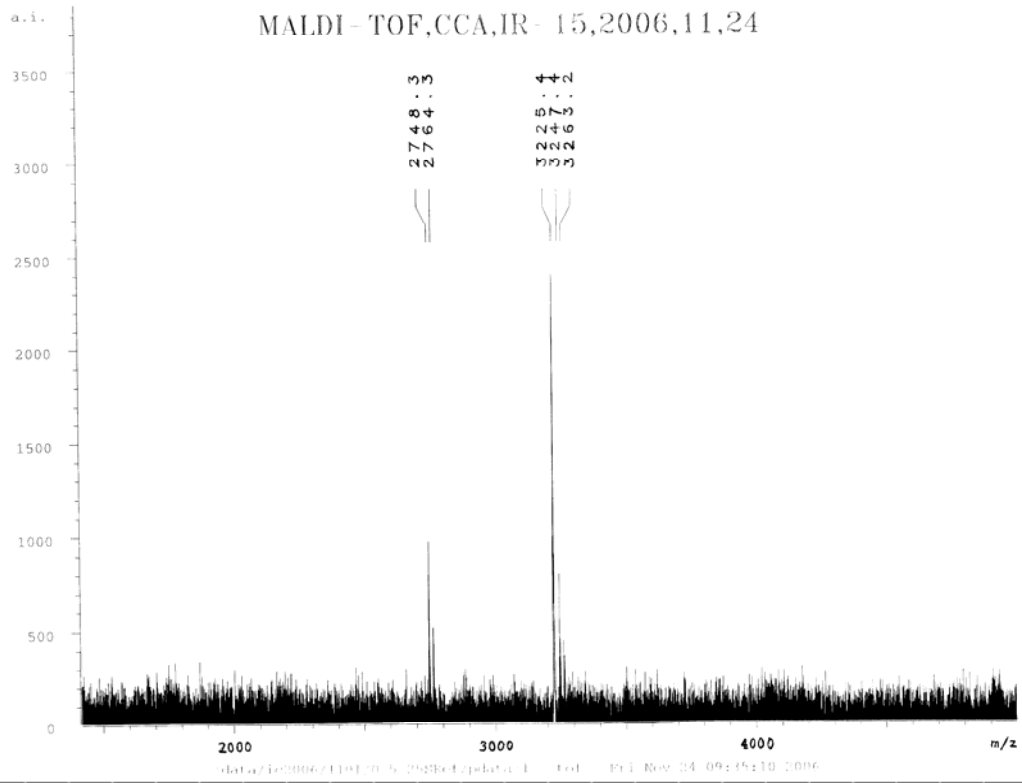

**Ir(dfp)<sub>2</sub>CZG<sub>2</sub> (13)**

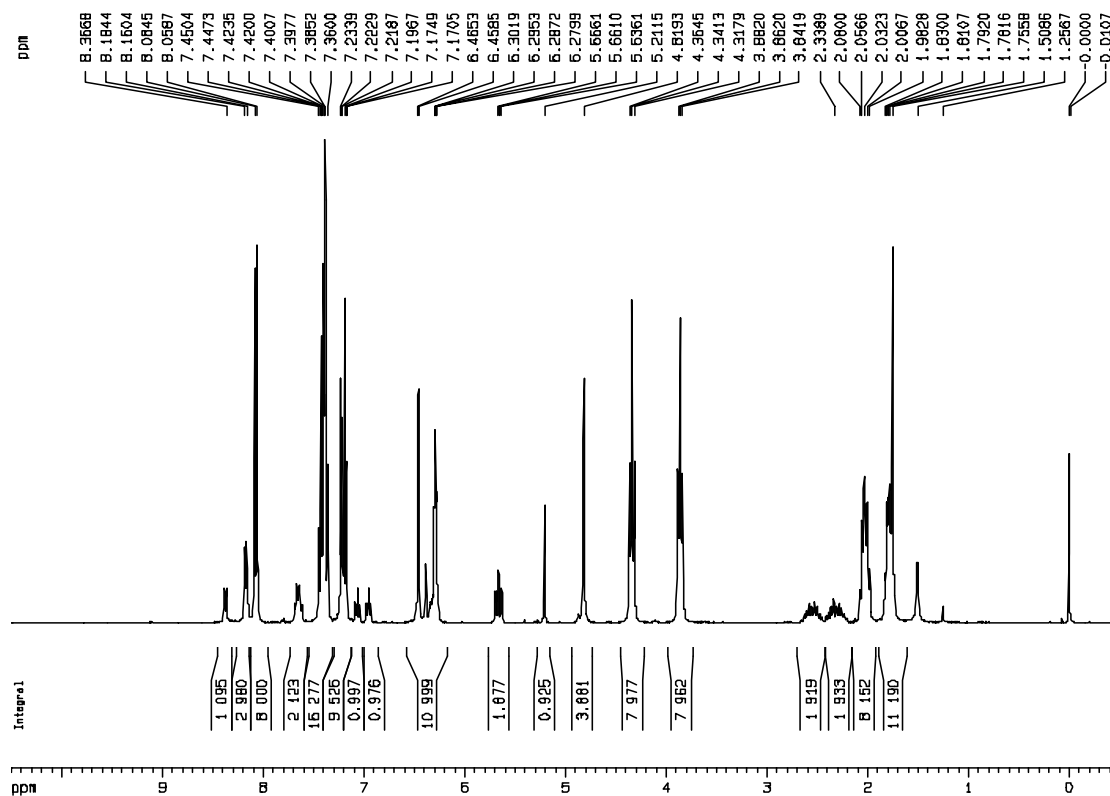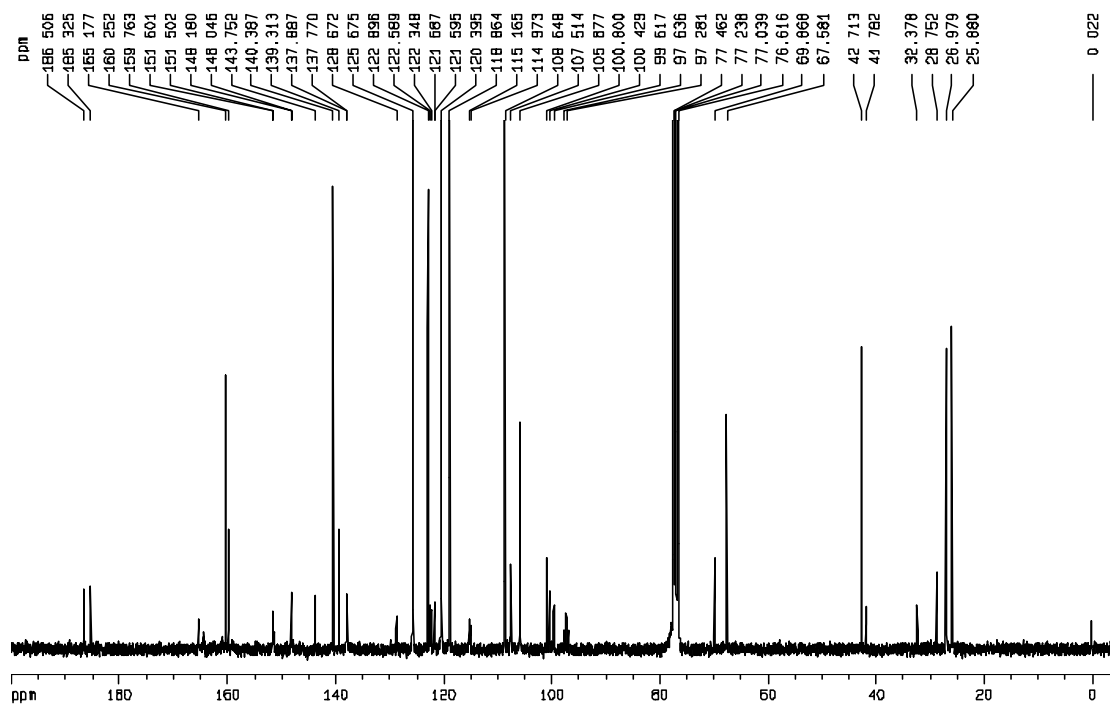

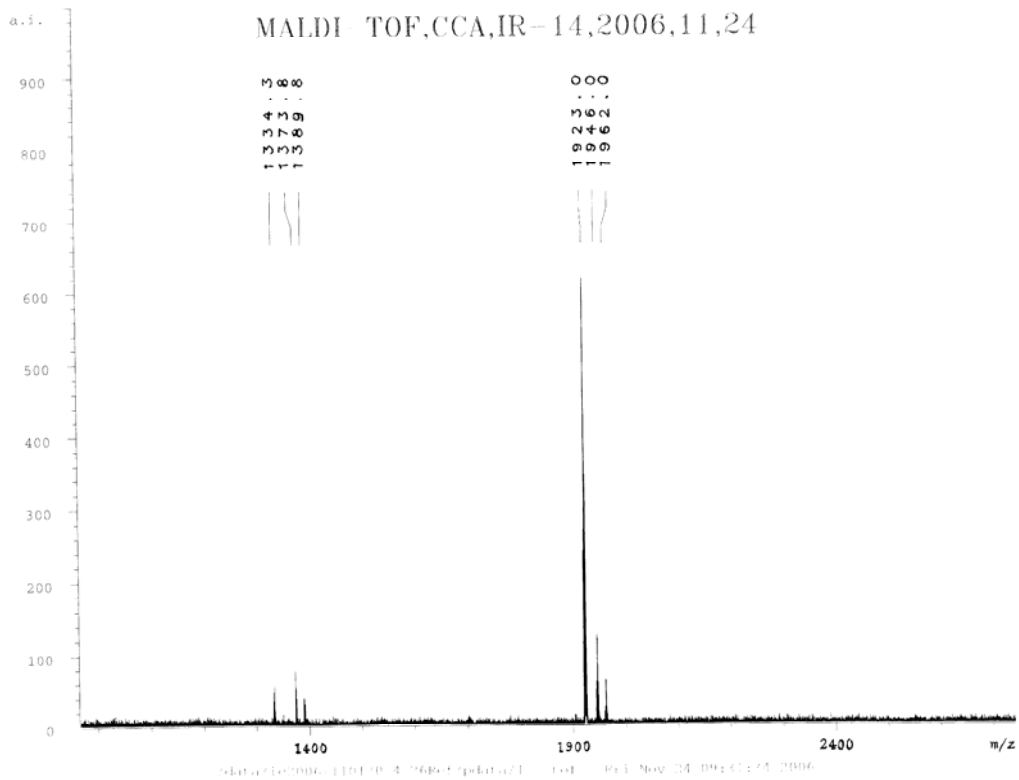

**Ir(btp)<sub>2</sub>CZG<sub>2</sub> (14)**

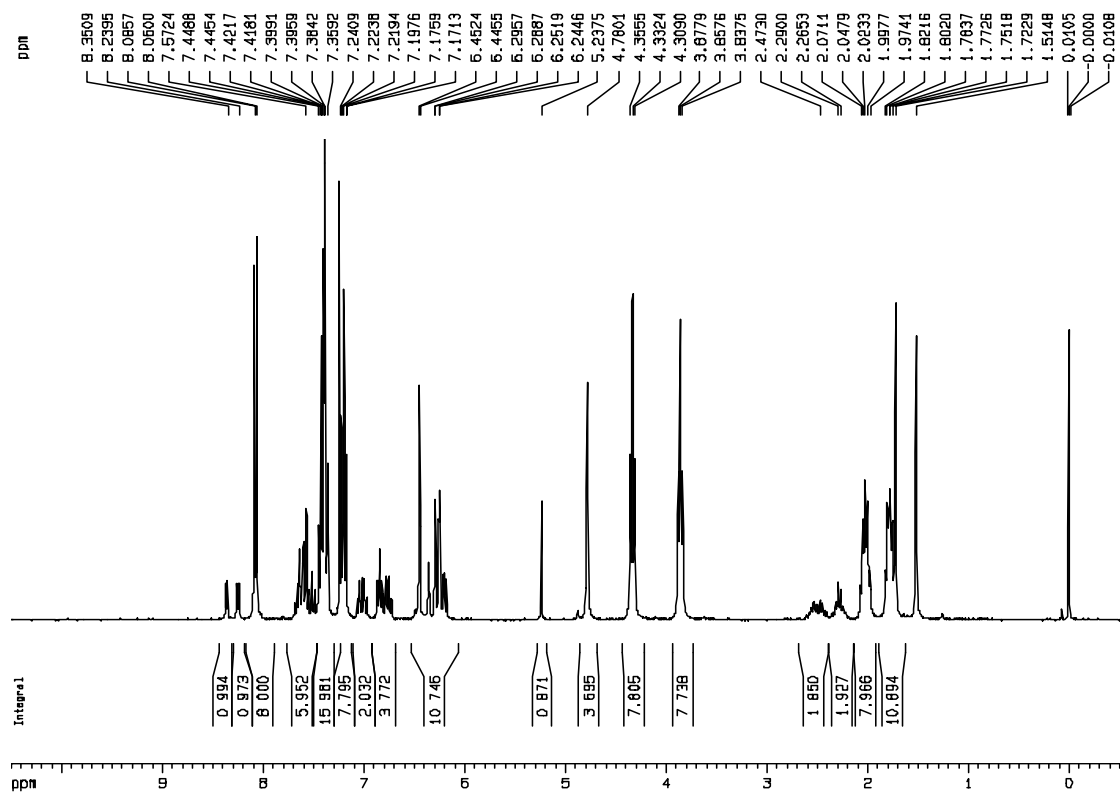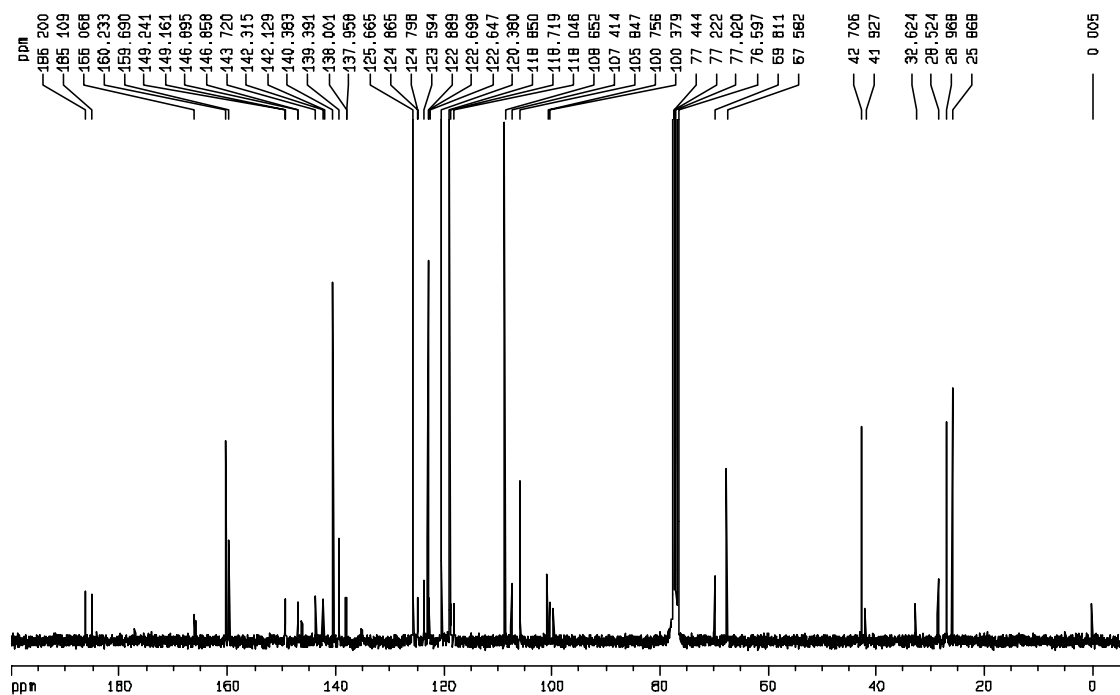

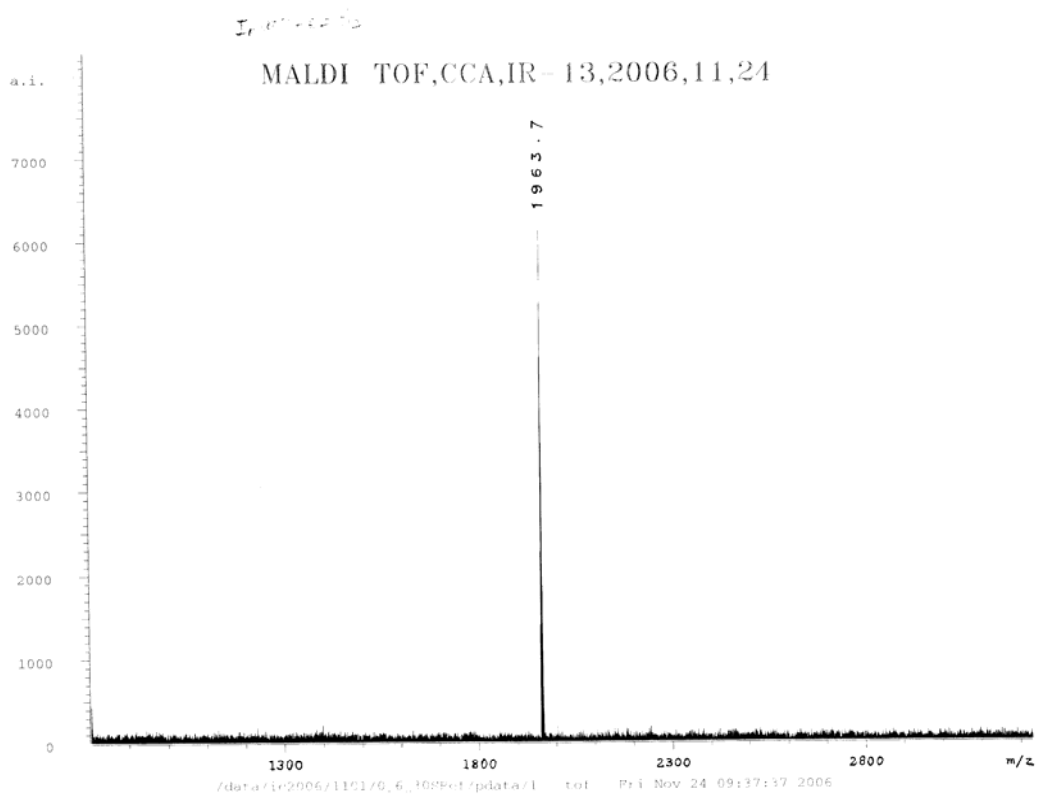

Supplement: b701822c.pdf [file b701822c.pdf]
